# Supplementary material for: Role of discrete recharge from the supraglacial drainage system formodelling of subglacial conduits pattern of Svalbard polythermalglaciers
Source: Copernicus journal article supplement (doi:10.5194/tc-2017-219), 2018-02-02
Supplement: Supplementary file [file tc-2017-219-AC1-supplement.pdf]

# Review of "Role of discrete recharge from the supraglacial drainage system for modelling of subglacial conduits pattern of Svalbard polythermal glaciers"

Referee 1.

## General comment

- Comment from Referee:

This paper aims to assess the importance of supraglacial hydrology on subglacial water flow. I believe this to be a very important topic in the realm of subglacial hydrology, which could have important implications for other environments including Greenland. The paper presented here, makes use of classical formulations of hydraulic potential to define subglacial water flow paths, then by some mechanism, the model is run with discrete water inputs and a supraglacial hydrology model and the results are compared. It is possible that this simplistic approach could serve as a useful framework to quantify the effects of supraglacial hydrology on the subglacial drainage system. **However, the steps that taken to apply the different hydrology distributions to the subglacial system is not clear to me. Until this is clarified, it is not possible to judge the scientific quality of this work.**

Author's response:

All the grid cells of the subglacial model are weighted by the total amount of water penetrating the glacier or not thanks to our supraglacial drainage mapping and the modelling of the different water catchment areas.

Author's changes in manuscript:

Few sentences will be add to clarify the methodology.

- Comment from Referee:

Many of the sentences, while mostly comprehensible, are difficult to follow. Some terminology is misleading, confusing or incorrect. The presentation of some data is very poor and not of the standard of scientific publications (significant figures...) Lastly, the manuscript is poorly organized.

It appears that Mr. Decaux is a PhD student. I believe that his advisors must do a more thorough job of preparing this manuscript and guiding Mr. Decaux; it is not the job of reviewers to do this. Should the methods prove to be viable, I believe that the results, when fully described and presented in a logical manner, presented here could be a demonstration of variability caused by the different treatments of supraglacial hydrology. The results of the paper could be interesting, however, because of the issues with organization and the lack of clarity in the methods, I do not see how this can be

accepted for publication. I hope to have provided some examples and comment, which when applied to the remainder of the manuscript, can improve it in the event of another submission.

Author's response:

I totally agree for the language mistakes, that is why, as we have no native English involve in the paper, it will be send to a professional person to correct the language before the final submission. Even if the mapping of the supraglacial system was done manually, we believe that the combination of high resolution satellite images with field observations and GPS measurements gave us a good representation of the supraglacial system of the two glaciers.

Author's changes in manuscript:

English language will be corrected.

The abstract and the introduction will be reworked as mentioned below. Also some part of the subsection will be move between each other as mention below in the view of a better organization of the paper which will make the paper clearer.

## Terminology

- Comment from Referee:  
**Recharge:** This either needs a new word or to be specifically defined. Do you mean seasonal water flux? Would mean seasonal water discharge be better? Discharge sum?

Author's response:

**Recharge** is a term widely used in the literature, e.g.:

Benn, Douglas, et al. "Englacial drainage systems formed by hydrologically driven crevasse propagation." *Journal of Glaciology* 55.191 (2009): 513-523.

Siegel, D. I., and R. J. Mandle. "Isotopic evidence for glacial meltwater recharge to the Cambrian-Ordovician aquifer, north-central United States." *Quaternary Research* 22.3 (1984): 328-335.

Ofterdinger, U. S., et al. "Environmental isotopes as indicators for ground water recharge to fractured granite." *Ground water* 42.6/7 (2004): 868.

Ofterdinger, U. S., et al. "Environmental isotopes as indicators for ground water recharge to fractured granite." *Ground water* 42.6/7 (2004): 868.

Döll, Petra, and Kristina Fiedler. "Global-scale modeling of groundwater recharge." *Hydrology and Earth System Sciences Discussions* 4.6 (2007): 4069-4124.

Gulley, J. D., et al. "The effect of discrete recharge by moulins and heterogeneity in flow-path efficiency at glacier beds on subglacial hydrology." *Journal of Glaciology* 58.211 (2012): 926-940.

**Recharge** refers to any input of water in the system (occurring mainly during the ablation season).

Author's changes in manuscript:

**Recharge** will be better defined in the abstract and in the Introduction.

- Comment from Referee:

**discrete recharge/ homogeneous recharge:** I think this is misleading. Homogeneous recharge, to me, seems like putting water equally over the glacier bed. I might suggest the terms with/without supraglacial hydrology. Whatever the terminology, it must be made clear in the introduction/methodology. Sometimes the work theory is used, I think a better word would be "test case" or "scenario"

Author's response:

Yes you well understood the notion of Homogeneous recharge, it is "like putting water equally over the glacier bed" or having water put all over the glacier bed in function of the spatialized water runoff model used (like explain page 9 with the different simulation scenarios). It will be clearer to use "spatially uniform recharge" instead of "homogeneous recharge" as used by Gulley et al 2012

Author's changes in manuscript:

"Homogeneous recharge" will be change into "spatially uniform recharge".

"discrete recharge" will be better defined in the abstract and introduction part.

We will replace "homogeneous water recharge theory" by "spatially uniform recharge test case".

We will replace "discrete water recharge theory" by "discrete water recharge test case".

We will change "hydraulic potential theory" into "hydraulic potential gradient" or "hydraulic potential surface".

- Comment from Referee:

**precipitations:** This is not a word. Use precipitation.

Author's response:

You are right.

Author's changes in manuscript:

We will replace “precipitations” by “precipitation”

- Comment from Referee:

A large point is made of these glaciers being **polythermal**. However, I found it hard to follow how this fit into the scheme presented here. Discuss the implications of it being a polythermal glacier, including in **Methods** and **Discussion** or only briefly mention in Study area.

Author's response:

We made a point on the fact that they are polythermal because considered cold ice as impermeable and warm ice as permeable. But as mentioned by the second referee, warm ice is not considered as permeable anymore. It will not change our results and conclusions but it will allows us to increase the impact of our article by extending our results for all glaciers (polythermal, temperate and cold) displaying a channelized supraglacial system with moulins and/or crevassed areas. So we will focus on the different surfaces properties:

- firn = infiltration and englacial circulation.
- bare ice (cold or warm) displaying stream on the surface = runoff.
- crevassed area = penetration of water.

Author's changes in manuscript:

We will correct this point in the different parts of the article.

- Comment from Referee:

**conducts:** I assume you mean “conduit”.

Author's response:

You are right.

Author's changes in manuscript:

We will replace “conducts” by “conduits”.

## Organization

- Comment from Referee:

**Abstract** This needs to be reworked. For improvement, I encourage you to look at resources such as this one: <http://sepwww.stanford.edu/sep/prof/abscrut.h>

Author's response:

You are right.

Author's changes in manuscript:

The abstract will be improve.

- Comment from Referee:

**Introduction** consists of three parts. 1) The background knowledge, broad to specific. 2) The gap in knowledge that the paper will address. 3) Your solution to the knowledge gap. Your work should only be discussed in the last paragraph or two, and should summarize what you will do. The description that takes up most of the introduction here does not belong here.

Author's response:

You are right.

Author's changes in manuscript:

We will develop more the background knowledge about the models already existing and better precise the gap in knowledge. We will better summarize our work and focus more on how we will answer to the gap mentioned at the beginning of the introduction. Also we will move a part of the actual introduction in the methodology part.

- Comment from Referee:

**Page 5 Section 3.1.1.** This paragraph is way too long. Try making it just a couple of sentences describing the overall scheme. Put dates, datasets, etc. in the respective subsections. Also make this section 3.1. Consider changing the name of the previous section to **Study sites and datasets** and put the dataset description there. i.e. weather data, imagery.

Author's response:

You are right.

Author's changes in manuscript:

We will put this paragraph into study sites and datasets. We will make this paragraph shorter by removing all the explanations on the reason of the use of VHRS.

- Comment from Referee:

I would encourage you to make the **descriptions of experiments** a separate subsection. Its title could be "model runs" or "experiment design".

Author's response:

You are right.

Author's changes in manuscript:

We will make an extra subsection for the description of the different scenarios calls "model runs".

- Comment from Referee:

**Page 10 Lines 6-8** You present several different K values. However, your results only utilize a few. Either exclude the others, or make the plots/maps available in some kind of supplementary material.

Author's response:

We explain why we do not present the results for some K values page 13 lines 1-3. The fact that the whole K values are mentioned allows us to justify why we are focusing on the three K value K=0; K=0.85 and K=1. Therefore it seems essentials to mention them to show the logic of our selection.

Author's changes in manuscript:

We make available 6 extra maps per glacier with discrete and homogeneous recharge for K=0.75; K=0.5 and K=0.25 in an appendix part.

- Comment from Referee:

I found quite a few **Results** presented in the **Discussion** section. This is a big issue with this paper. Separating these topics can be difficult. This needs to be reorganized, and consider if combining the sections could be a good idea.

Author's response:

We do not agree with this statement. Here is the list of the results presented compare to the discussion part. One thing should move from Results part to Discussion part, it is the interpretation of different K scenarios.

Also we prefer to keep the classical way of an article organization without combining the two sections.

Results:

- Supraglacial map description
- Interpretation of different K scenarios
- Hansbreen simulation description + no water volume but identification of main channel
- Werenskioldbreen simulation description + no water volume but identification of main channel

Discussion:

- Supraglacial map discussion
- Discussion of Hansbreen simulation + water volume
- discussion of Werenskioldbreen simulation + water volume
- Discrete recharge/Homogeneous recharge
- Connection with Paierlbreen
- Limit of the model in water volume values

Author's changes in manuscript:

We will move from Results part to Discussion part the interpretation of different K scenarios.

- Comment from Referee:

**Supraglacial drainage system evolution.** This section has some interesting little facts, however, I don't see how it is coherent to the overall story of the paper (and I am not entirely sure what the greater story is). Either find a way to make it relevant, or excluded it.

Author's response:

It is important because it allows us to estimate the validity duration of our model. This timescale evolution might be the same for all the Arctic glaciers and because we demonstrate that it plays a very important role on the location of the subglacial channels, it is crucial to analyze its evolution through the time.

Author's changes in manuscript:

We will develop a bit more in the discussion part the fact that it allows us to estimate the validity duration of our model and why it is important.

- Comment from Referee:

**Page 13 Lines 1-12** These descriptions of K should be condensed and added to methods.

Author's response:

We agree that we have to move it but it should be in the discussion part because we find this classification:

- K=1; K=0.85 (because both of them display more than one outflow)
- K=0.75; K=0.5; K=0.25; K=0 (because all of them display one outflow)

thanks to our results. Therefore, we can not move it in to methods.

Author's changes in manuscript:

We will move from Results part to Discussion part the interpretation of different K scenarios.

- Comment from Referee:

**Page 13 Lines 13-15** Where are these caves discussed? How are caves better represented with a discrete water recharge? This needs to be clearer

Author's response:

The caves are only mark on the map in study area section. You are right, it is necessary to mentioned them in the text in this section. Also, we will explain how it is better represented with K=0.85 discrete recharge scenario (one or two sentence).

Author's changes in manuscript:

We will mention the caves in the text of study area section. We will explain how it is better represented with K=0.85 discrete recharge scenario (one or two sentence).

- Comment from Referee:

**Page 17 Lines 10** Discuss why this is important to your work.

Author's response:

You are right it is developed in the conclusion page 19 lines 7-9 but not in the discussion part.

Author's changes in manuscript:

We will develop a bit more on how the supraglacial system evolution tells about the subglacial system evolution.

- Comment from Referee:

**Page 17 Lines 12-13, Lines 27-29** I believe most people would believe amounts of water to be a result as opposed to something to be discussed. Also what to the + and - stand for? What are the uncertainties? Standard deviations? Model errors? Variability in the input data? You present the water discharge quantity in confidence to the m<sup>3</sup>. That seems like an overly precise measurement to me. This is not how numbers in are represented in science, look into significant figures .

Author's response:

We can oppose our total water input volume calculated for 2015 with the total runoff of all the catchment of Werenskioldbreen area measured on the field for the years 2007-2011 by Majchrowska et al., 2015. This is not possible for Hansbreen as it is a tidewater glacier. Also we



can compare the data of having 68.7% of the water supply by meltwater with observations made by Majchrowska et al., 2015. With those comparisons we know that we achieve realistic values. +/- is the calculated error of our spatialized water runoff calculation. You are right the values should not be present with a confidence to the  $m^3$ .

Author's changes in manuscript:

We will validate our spatialized water runoff calculation by comparing Werenskioldbreen values with Majchrowska et al., 2015 values.

We will quickly explain our calculation error.

We will change our  $m^3$  values confidence. For example water values will be presented with this confidence  $43.81 \cdot 10^6 m^3$ .

- Comment from Referee:

**Page 17-18** You repeatedly talk about outflow observations. What kind of data is this? Another paper (then cite)? if not, you need to make section in your **Methods/Study area** to describe how this data was collected. This shows that your model can somehow be verified (a very good thing...). Making a point of describing this will strengthen your conclusion.

Author's response:

You are right. There were some outflows positions mapped in the past and it fit quite well with our model.

Author's changes in manuscript:

We will cite Palli et al 2003, it fit perfectly with the outflows map which confirm the validity of the model of about 20 years. Also fit in Grabiec 2017 for Hansbreen. It fit also with Werenskioldbreen outflows publish in Majchrowska, 2015. Finally, it fit with personal field observations from the authors.

We will also add some outflow position mapped on our two results figures.

- Comment from Referee:

**Page 18 Lines 26** underestimated not under-estimating.

Author's response:

You are right.

Author's changes in manuscript:

We will replace “under-estimating” by “underestimated”.

- Comment from Referee:

**Page 20** I think you could probably end your paper on a stronger note by highlighting the difference between the two situations.

Author's response:

This is done page 19 lines 19-23.

Author's changes in manuscript:

We will add a sentence, page 19, saying that in any cases, considering a discrete recharge display more accurate results.

## Scientific Comment

- Comment from Referee:

**Page 2 Lines 1-6** Why is subglacial hydrology important? Sliding? subglacial sediment transport? ice marginal lake drainages?

Author's response:

You are right, we mention the impact on dynamic in the abstract but not in introduction: part of the work which should be done on the introduction as mentioned before.

Author's changes in manuscript:

We will improve the introduction.

- Comment from Referee:

**Form Page 2 Line 7 to Page 3 Line 10** This needs to be rewritten, omitting what is done in your experiment, and using the formulation above.

Author's response:

You are right: part of the work which should be done on the introduction as mentioned before.

Author's changes in manuscript:

We will improve the introduction.

- Comment from Referee:

**Page 2 Lines 33** Many have worked on the role on non-uniform water input to hydraulic models, these include Werder et. al. 2013, Hewitt 2013, Poinar et al., 2015.

Author's response:

You are right: part of the work which should be done on the introduction as mentioned before.

Author's changes in manuscript:

We will improve the introduction.

- Comment from Referee:

**Methodology, Spatialized water runoff calculation** Shorten to "Spatially distributed runoff estimation". More importantly, it is not clear how this is done. Do you use a T-index model? Do you prescribe the discharge with an elevational gradient/hypsometry? This needs a better explanation.

Author's response:

You are right.

Author's changes in manuscript:

We will rename the section into "Spatially distributed runoff estimation".  
We will better describe the relation between summer mass balance and elevation mentioned in this section.

- Comment from Referee:

**Page 8 Line 17.** Where does the bed DEM come from?

Author's response:

The origin of the DEM of the bedrock is well described in the dataset part with in addition the reference to Grabiec et al 2012.

Author's changes in manuscript:

Nothing.

- Comment from Referee:

**Methodology** You need a section detailing how the  $Q_h$  is coupled to the subglacial model. The whole paper relies on this, and it is not evident to me what was done. This is one reason why I don't find the paper to be publishable.

Author's response:

You are right, the way how the water input data are apply to the model is explained in the description of the scenarios, page 9 lines 8-26, but for some precise case not with a general point of view.

Author's changes in manuscript:

We will better explain the fact that we take into account all kind of precipitation.

We will change  $Q_h$  into something else to precise that is precipitation and not the total amount of water.

We will precise that we obtain three input files with water values:

- Precipitation
- Ablation
- Precipitation + ablation

We will better develop the sentence page 8 line 23-24 by explaining how the water input data are apply to the model in a general point of view.

- Comment from Referee:

**Page 10 Lines 1-2** No. Rothlisberger 1972 and Weertman 1972, discuss englacial water flow, not surface water flow.

Author's response:

You are right for Weertman.

Regarding Rothlisberger, he says that the pressure in the conduits depend directly on the discharge so by the logic of the mechanisms involve, it implies that it depends on the recharge.

Author's changes in manuscript:

We will find other article to cite.

We will keep Rothlisberger and explain better the relation.

- Comment from Referee:

**Page 17 Lines 7-9** There has been plenty of work examining moulines, if you choose to discuss them, then add citations.

Author's response:

You are right.

Author's changes in manuscript:

We will add citations.

- Comment from Referee:

**Page 18 Lines 12-14** How do you know that water does not penetrate the cold glacier ice? Do you have field observations? or did you read about this in a paper (which you then NEED to cite)?

Author's response:

This is well known in glaciology.

Author's changes in manuscript:

We will add citations the first time we mention this phenomenon in introduction page 3 line 28 plus say that it is impermeable. (Paterson, 1994; Hodgkins, 1997; Ryser, C., et al, 2013).

- Comment from Referee:

**Page 19 Lines 20-23** How does subglacial hydrology differ between tidewater and land-terminating glaciers? How do tidewater glaciers become more crevassed? This sections need more citations and should go in the discussion section. Poinar et al., 2015 discusses the implications of surface hydrology and moulins. I would be nice to put this work in relation to that research.

Author's response:

You are right, it needs more precision. The fact that tidewater glaciers are more crevassed is well known in glaciology. This is due to the fact that in general, tidewater glaciers have a higher dynamic than land-terminating glaciers. There is no big differences between tidewater and land-terminating glacier's subglacial hydrology system, except due to the fact that tidewater glaciers are more crevassed.

Author's changes in manuscript:

In the discussion part we will develop the differences between tidewater and land-terminating glaciers and add new citations.

We will include Poinar et al 2015 and Van Der Veen 2007 citation.

- Comment from Referee:

**Page 19 Lines 24-28** Here it seems like you are trying to discuss the future of the subglacial drainage system, with the moving moulins due to the flow of ice. However, as Fischer et al. 2005 point out surface elevation changes (do to increased melt, etc.) also will affect the location of the subglacial drainage system. This is another point worth mentioning looking toward the future.

Author's response:

The fact that we based our estimation of the subglacial drainage in the future on the evolution of the supraglacial drainage system which is the result of the glacier flow and the surface elevation changes, by definition, take into account those two components. In Fisher et al 2005, the impact of the glacier geometry changes on the subglacial system are noticeable mainly due to the presence of a medial moraine which is increasing and impact the system. This is not the case for our glaciers. Even if there is a medial moraine on Werenskioldbreen, it does not impact the subglacial system as the channels are passing bellow this medial moraine (observed by Czech explorations cf their field report).

Author's changes in manuscript:

Nothing.

## Figures

- Comment from Referee:

I do not think that the coordinate system used in necessary to mention.

Author's response:

It was not mentioned before but it was a request of the editor before the submission.

Author's changes in manuscript:

We will mention it for the first figure but not for the following ones knowing that it is the same.

- Comment from Referee:

**Figure 1** Mass balance, not Masse balance. Also adding some interpreted flowlines will help the reader orient themselves.

Author's response:

You are right for mass balance. Concerning the flow direction, having the front part of the glacier visible + the topographic lines, in our point of view, it is not necessary to add some interpreted flowlines having the basic knowledge that a glacier is flowing from higher to lower elevation due to the gravity.

Author's changes in manuscript:

We will change "masse balance" for "mass balance".

- Comment from Referee:

**Figures 7 and 8** What are the different columns? Mention this in the caption. Also I find the UTM markers a bit distracting and not necessary. These should be removed.

Author's response:

You are right for the UTM coordinate. There is nothing specific to the columns. It is just needed to refer to the legend and to the letter corresponding to the figure (a); b); etc...).

Author's changes in manuscript:

We will remove the UTM coordinates.

Other changes will be applied in the organization of those two figures, cf answer to the other review bellow.

# Interactive comment on “Role of discrete recharge from the supraglacial drainage system for modelling of subglacial conduits pattern of Svalbard polythermal glaciers” By Léo Decaux et al.

Referee 2.

D. Benn (Referee)

dib2@st-andrews.ac.uk

- Comment from Referee:

This paper looks at the relationship between surface water inputs and subglacial drainage networks, an important topic that previously has received relatively little attention. I especially like the careful mapping of surface drainage networks and the identification of moulins and other water input points, and the use of these data as inputs for the subglacial water routing model. The paper thus has the potential to be a very useful addition to the literature.

However, the paper needs a lot of work before it is ready for publication. Referee 1 has made specific recommendations for tightening up the paper structure, with which I agree. These recommendations will help to create a clearer logical progression from observations to analysis, followed by validation of results and interpretation. This will clarify the aims, results and conclusions of the paper, increasing its clarity and impact. I also agree with Referee 1 that the language requires thorough checking throughout. The grammar, spelling and sentence structure all need careful revision, ideally with the help of a native English speaker. I don't know how 'conduit' came to be spelled 'conduct' throughout the paper, but the fact that this fundamental term came to be misspelled in a paper about glacier hydrology highlights the extent of the problem.

Author's response:

I totally agree for the language mistakes, that is why, as we have no native English involve in the paper, it will be send to a professional person to correct the language before the final submission.

Author's changes in manuscript:

English language will be corrected.

- Comment from Referee:

For the most part, the methods are sound and the assumptions reasonable. One of the assumptions, however, is highly questionable with some implications for the reliability of the results. On p. 4, line 3 and following, it is stated: "In the accumulation area temperate ice and firn are present, allowing water percolation through the glacier



body..." Using this assumption, the entire upper part of Hansbreen is defined as a WIA (p. 6, line 23; p. 9, line 28). Temperate ice was considered to be permeable by some early authors (e.g. Nye and Frank, 1973), but this is no longer the accepted view (see Fountain and Walder, 1998). The paper by Lliboutry (1971: J Glac 10, 15-29) is well worth reading on this topic. He provides detailed observational evidence and theoretical considerations that show that bulk temperate ice cannot be permeable. These considerations thus invalidate the assumption that water can directly access the bed wherever temperate ice occurs through the whole glacier thickness (such as upper Hansbreen). Instead, firn aquifers are perched above essentially impermeable ice, with the transition occurring at about 30 m depth in the European Alps. Thus inclusion of areas of temperate ice as WIAs (Fig. 3a) is thus not justified. The WIA on Hansbreen should be redrawn omitting the temperate ice zone, and the model re-run.

#### Author's response:

You are right.

From the previous studies (Fountain and Walder, 1998; Lliboutry, 1971 and other), water in the accumulation area percolate through the snowpack then through the firn to create a layer of saturated water at the interface warm ice and firn. This water flows at this interface and come out on the surface at the equilibrium line or reaches the englacial system thanks to crevasses in the accumulation area. Because we are not able to visualize the crevasses in the accumulation area, if they exist, and because the area situated just below the equilibrium line is considered as a water input area (large crevassed area), we will include this water in this same water input area. To summarize, we will include the water coming from the accumulation area in the water input area mapped just below the equilibrium line. In fact from the literature, it should reach the input water area either by the englacial system or by the surface which will then be directed to the glacier bed by this big water input area just below the equilibrium line.

Also thanks to a study made by Grabiec et al, 2017, we have an estimation of the water refreezing (excluding capillary water that freezes in fall) inside the firn for Hansbreen. So a big part of the water storage in the firn will be included in the new run of the model. We do not expect so many changes on the results except that subglacial channels under the accumulation area should disappear and the water volume value of the conduits in the upper part of the glacier will be a bit different. Also it will not be any scenarios with a subglacial connection with the adjacent glacier Paierlbreen. This new result will reinforce the necessity of taking into account a discrete recharge for the subglacial modelling of the heavily crevassed tidewater glaciers.

#### Author's changes in manuscript:

The model will be re-run for Hansbreen. Some changes will appear on the results maps and on the water input area maps for Hansbreen.

- Comment from Referee:

Independent validation of the model results is of course difficult, given that most of the drainage system below the glaciers remains unobserved. So the location of outflow points (portals and plumes) is crucial. At present, this important information is not prominent enough in the text. It should be clearly flagged up as the key test of model output, ideally in a separate subsection labelled 'Model Validation'. The location of

meltwater portals and upwellings should be plotted on Figs 7 & 8, so the reader can clearly compare the predicted conduit locations with known efflux points. It is also worth noting that a similar model to the one used by the authors was successful at predicting the location of plumes in front of the tidewater glacier Kronebreen (How et al., 2017: The Cryosphere), and also indicates that the K value varies through the melt season. The fact that Scenario (5),  $K = 0.85$  represents subglacial channels observed at Crystal and Bird Brain Caves cannot be regarded as model validation. The modelled channels appear because the caves are specified as water influx points. The existence of subglacial channels extending from moulins at these locations is certainly worth highlighting, but this ought to be early in the paper - perhaps in Section 3.2 where the observational data are introduced.

Figures 7 & 8 are very interesting, but their impact can be greatly increased by simply changing the arrangement of the panels. At present, it is very difficult to assess the result and involves much tiresome switching back and forth between caption and panels. Instead, the panels should be arranged so that the two columns show Scenarios 2 & 5, and the three rows show  $K = 1, 0.85$  & 0. This will immediately allow readers to see how the water input and pressure assumptions influence the results.

Author's response:

You are right, the plumes locations and the outflows mapped for Hansbreen and Werenskioldbreen should be presented on the figures 7 and 8. Because those mapping were done in the past and published in other papers (Palli et al, 2003; Majchrowska et al, 2015; Grabiec et al, 2017), it will not be enough material to create a new subsection but those papers will be cited to refer to the mapping method. Also I agree with the fact that Crystal Cave and Bird Brain Cave are present because they were mapped as a water input area but there is only one scenario with discrete recharge ( $K=0.85$ ) which display a subglacial channel connected to those two cave system. Therefore in our point of view, it can be used as a validation tool. We agree with the new panel configuration proposed.

Author's changes in manuscript:

Mapped outflows will be added to figures 7 and 8. Outflows locations will be discussed in more details in the discussion part. The panel of those two figure will be rearranged as proposed: the two columns show Scenarios 2 & 5, and the three rows show  $K = 1, 0.85$  & 0.

- Comment from Referee:

On p. 8, line 9: the possibility is mentioned that additional water might be released from winter/spring storage in the snowpack. What about the opposite possibility? i.e. how much of the calculated melt might be retained in snow/firn? Does the model simply assume that all meltwater will enter supraglacial/subglacial transport, with zero surface storage? This issue is related to the erroneous attribution of the whole accumulation area of Hansbreen as a WIA. If meltwater in this zone is retained in the snowpack, instead of being immediately transferred to the bed, then this will significantly reduce the modelled water inputs to the bed possibly with major implications for the results.

In summary, this is an interesting paper with a lot of potential. I look forward to seeing a revised version that maximises the impact of the results.

Author's response:

As mentioned above, we have an estimation of the water refreezing (excluding capillary water that freezes in fall) inside the firn for the accumulation area made by Grabiec et al, 2017.

Author's changes in manuscript:

The storage will be taken into account in the new run of the model for Hansbreen.
